# Supplementary material for: Development of a Platform for Noncovalent Coupling of Full Antigens to Tobacco Etch Virus-Like Particles by Means of Coiled-Coil Oligomerization Motifs
Source: MDPI journal article supplement (doi:10.3390/molecules26154436), 2021-07-23
Supplement: s1 [file s1]

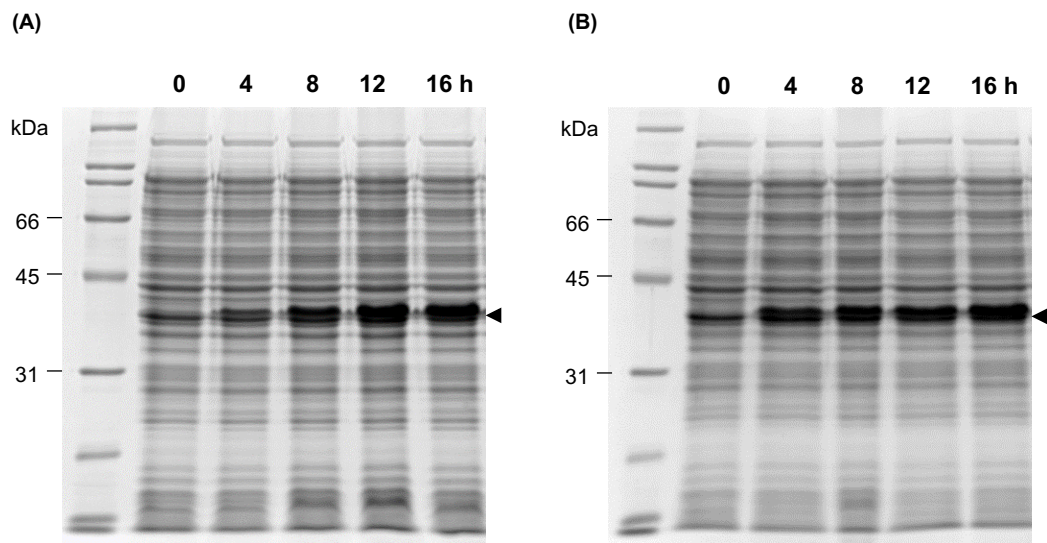

**Figure S1:** TEVK protein expression at two different concentrations of IPTG. (A) 0.5 mM IPTG (B) 2.0 mM IPTG in Terrific Broth (modified). Protein expression was analyzed by SDS-PAGE at 0, 4, 8, 12, and 16 h.
